# Supplementary material for: International retrospective study of allogeneic hematopoietic cell transplantation for activated PI3K-delta syndrome
Source: PubMed Central journal article supplement — J Allergy Clin Immunol. Author manuscript; Available in PMC 2022 Jan 11. (PMC8611111; doi:10.1016/j.jaci.2021.04.036), 2021-05-24

**A****T cell (CD3<sup>+</sup>) recovery by serotherapy use**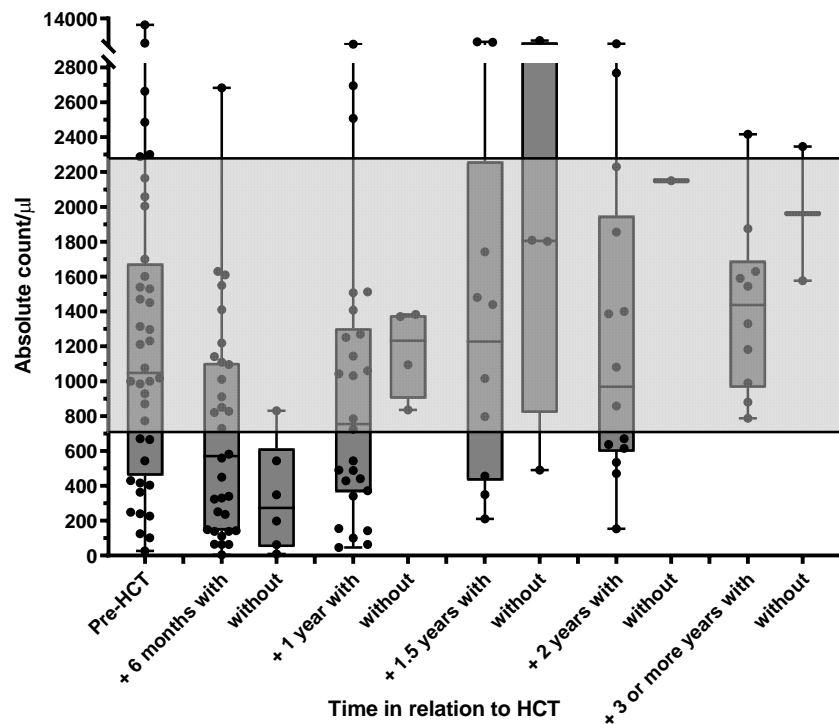**B****CD4<sup>+</sup> T cell recovery by serotherapy use**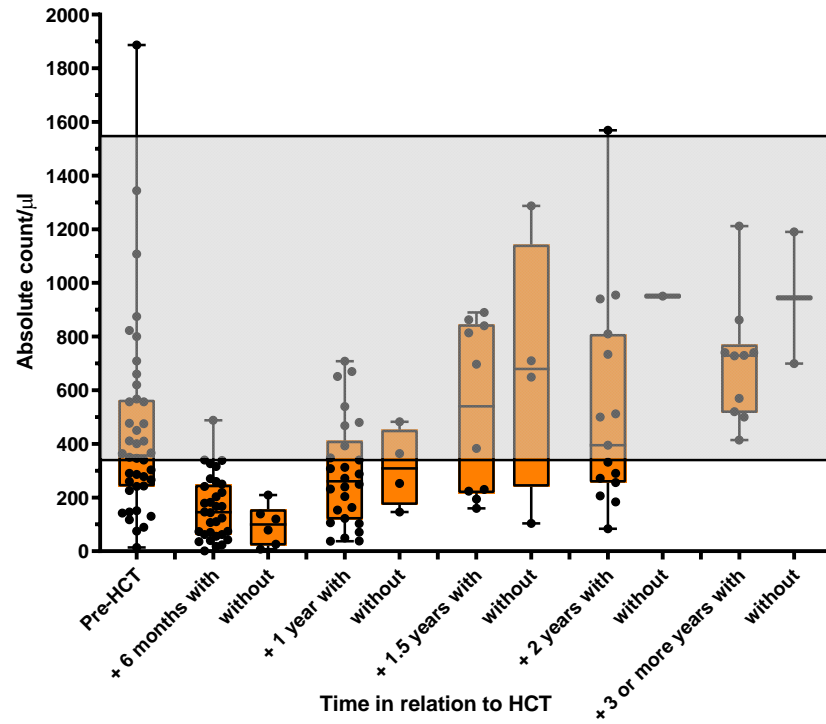**C****CD8<sup>+</sup> T cell recovery by serotherapy use**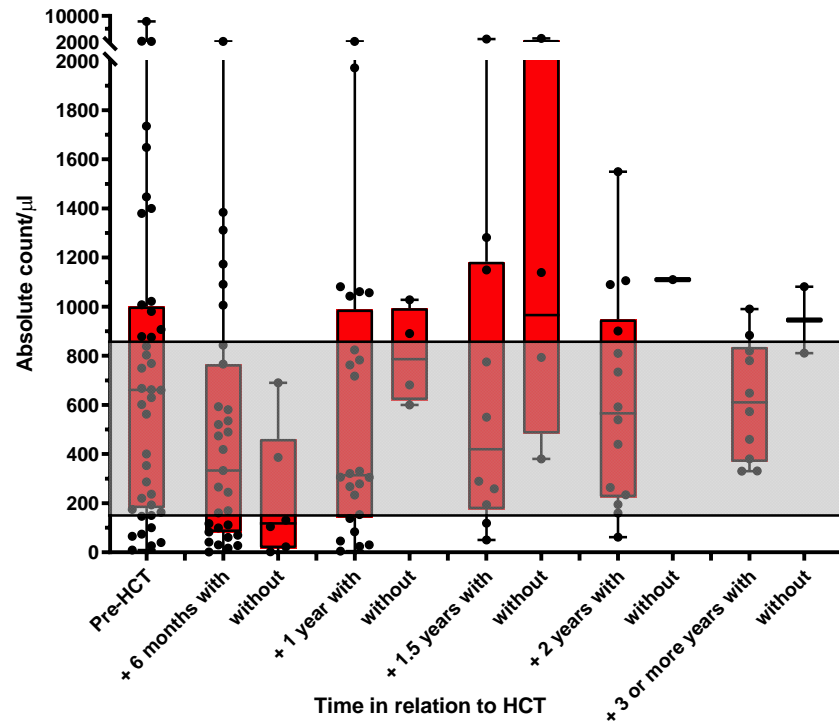**D**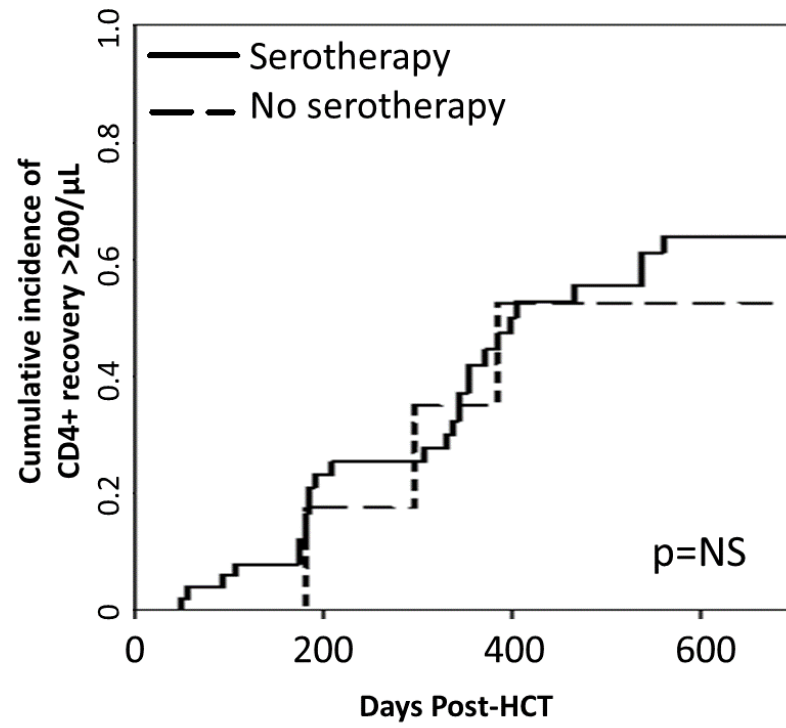

Supplement: NIHMS1717567-supplement-4.pdf [file NIHMS1717567-supplement-4.pdf]
