# Supplementary material for: International retrospective study of allogeneic hematopoietic cell transplantation for activated PI3K-delta syndrome
Source: PubMed Central journal article supplement — J Allergy Clin Immunol. Author manuscript; Available in PMC 2022 Jan 11. (PMC8611111; doi:10.1016/j.jaci.2021.04.036), 2021-05-24

Donor chimerism for all patients

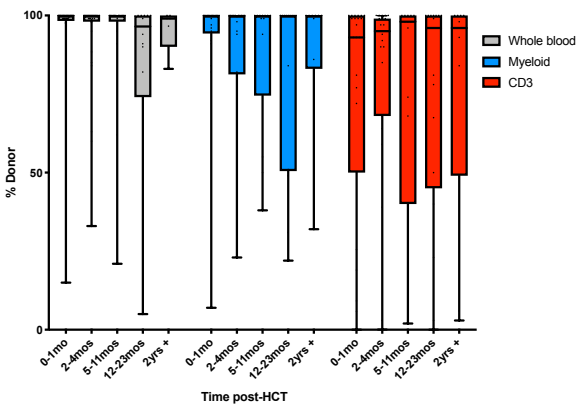

Donor chimerism in patients without DCI or GF

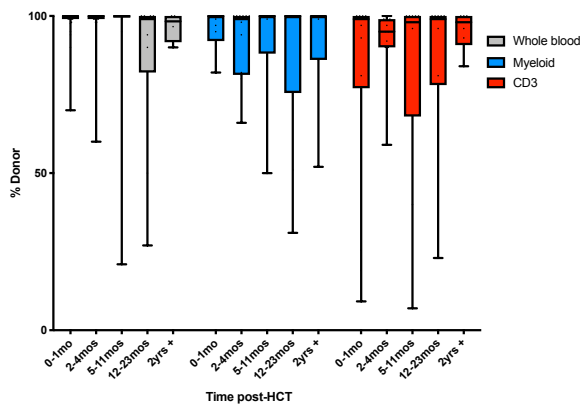

Donor chimerism in patients who ultimately received DCI or had GF

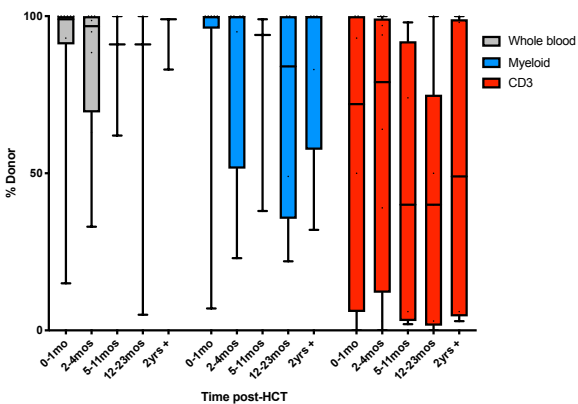

Donor chimerism in patients who ultimately received DCI without GF

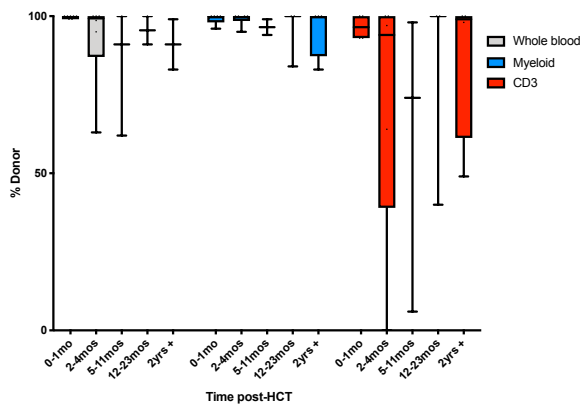

Donor chimerism in patients who ultimately had GF

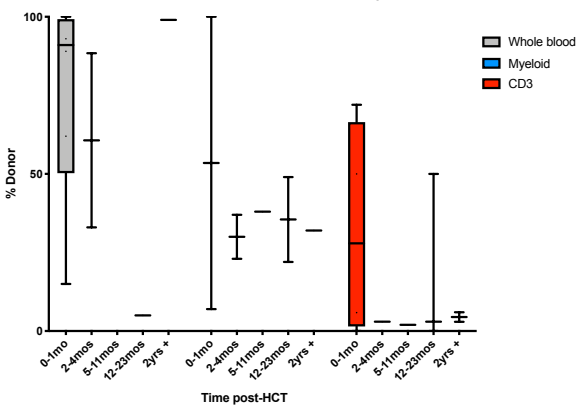

Donor chimerism for patients who received RIC

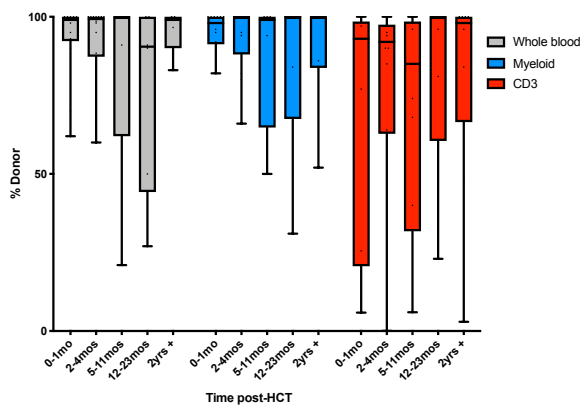

Donor chimerism for patients who received RT-MAC

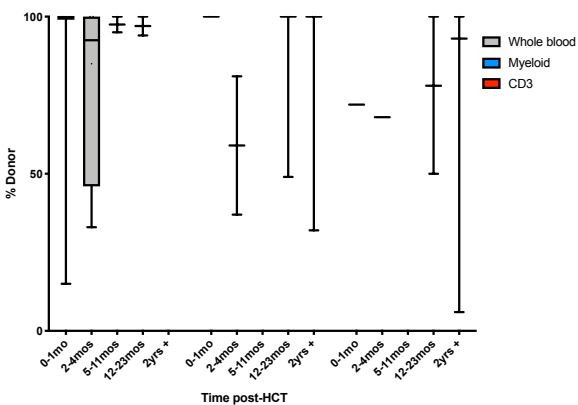

Donor chimerism for patients who received MAC

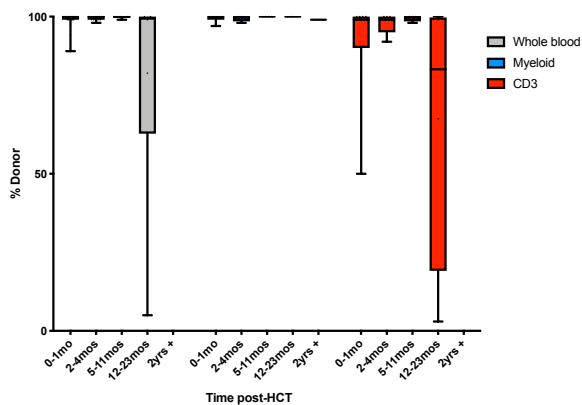

Supplement: NIHMS1717567-supplement-6.pdf [file NIHMS1717567-supplement-6.pdf]
