# Supplementary figures and images for: International retrospective study of allogeneic hematopoietic cell transplantation for activated PI3K-delta syndrome
Source: PubMed Central journal article supplement — J Allergy Clin Immunol. Author manuscript; Available in PMC 2022 Jan 11. (PMC8611111; doi:10.1016/j.jaci.2021.04.036), 2021-05-24

A.

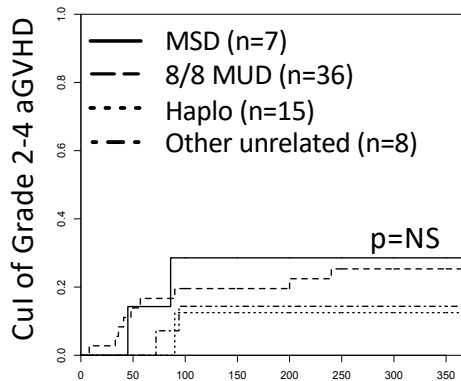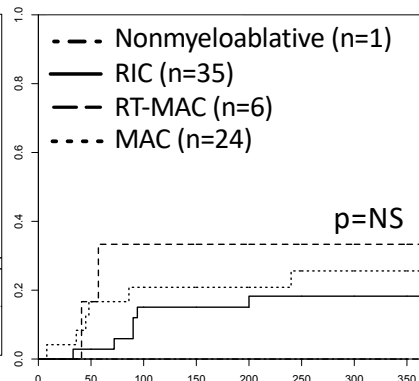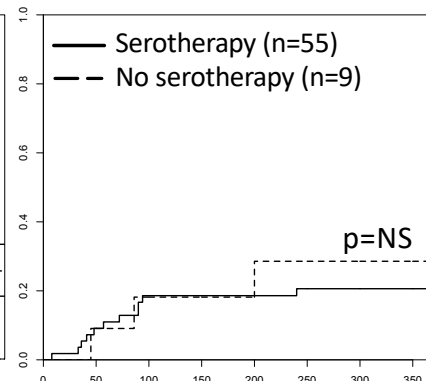

B.

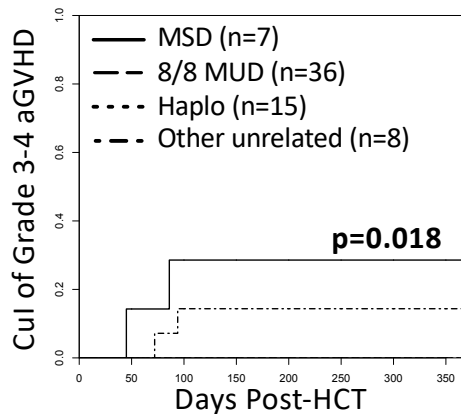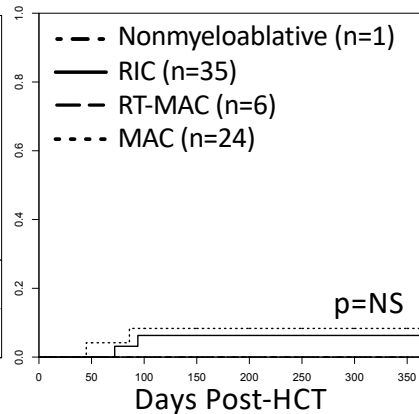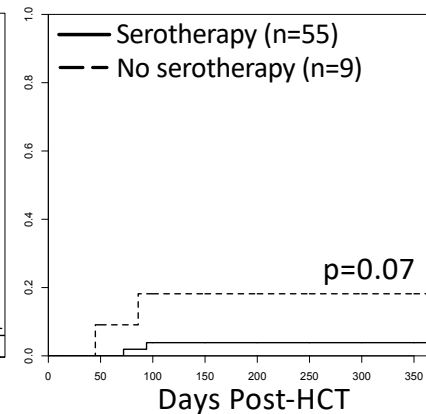

Supplement: NIHMS1717567-supplement-5.pdf [file NIHMS1717567-supplement-5.pdf]
